# Supplementary material for: Impact of increasing the proportion of healthier foods available on energy purchased in worksite cafeterias: A stepped wedge randomized controlled pilot trial
Source: PubMed Central journal article supplement (PMC6335439; doi:10.1016/j.appet.2018.11.013), 2019-02-01
Supplement: mmc2.pdf [file mmc2.pdf]

**S2 Table.** Regression coefficients from all variables in the primary analysis by site (impact on logged energy purchased from targeted food categories)

| Variable                                              |           | Coefficients<br>(95% CIs) <sup>1</sup> | Percentage change<br>(95% CIs) <sup>1</sup> | p <sup>1</sup> |
|-------------------------------------------------------|-----------|----------------------------------------|---------------------------------------------|----------------|
| Availability<br>intervention<br>period                | Site 1    | 0.007<br>(-0.083, 0.099)               | 0.68<br>(-8.08, 10.28)                      | 0.889          |
|                                                       | Site 2    | -0.087<br>(-0.169, -0.005)             | -8.37<br>(-15.64, -0.47)                    | 0.088          |
|                                                       | Site 3    | <b>-0.113</b><br>(-0.199, -0.028)      | -10.70<br>(-18.12, -2.62)                   | 0.046          |
|                                                       | Site 4    | -0.057<br>(-0.148, 0.035)              | -5.50<br>(-13.87, 3.70)                     | 0.281          |
|                                                       | Site 5    | <b>-0.203</b><br>(-0.312, -0.093)      | -18.36<br>(-26.90, -8.81)                   | 0.013          |
|                                                       | Site 6    | -0.043<br>(-0.145, 0.060)              | -4.21<br>(-13.65, 6.25)                     | 0.450          |
| Number of items sold in non-intervention categories   |           | <b>0.0004</b><br>(0.0002, 0.0005)      | 0.04<br>(0.02, 0.05)                        | 0.003          |
| Number of days pre- or post-intervention <sup>2</sup> |           | -0.0002<br>(-0.0009, -0.0005)          | -0.02<br>(-0.09, 0.05)                      | 0.587          |
| Day of the week<br>(Ref = Monday)                     | Tuesday   | -0.023<br>(-0.068, 0.023)              | -2.26<br>(-6.66, 2.35)                      | 0.373          |
|                                                       | Wednesday | -0.011<br>(-0.057, 0.035)              | -1.10<br>(-5.59, 3.59)                      | 0.650          |
|                                                       | Thursday  | <b>0.067</b><br>(0.018, 0.114)         | 6.90<br>(1.87, 12.19)                       | 0.038          |
|                                                       | Friday    | 0.056<br>(0.004, 0.106)                | 5.76<br>(0.44, 11.36)                       | 0.082          |
| Price increase                                        |           | -0.05<br>(-0.127, 0.026)               | -4.91<br>(-11.99, 2.72)                     | 0.252          |
| Site-supplied free lunches                            |           | <b>-1.78</b><br>(-1.95, -1.62)         | -83.19<br>(-85.75, -80.17)                  | <0.0001        |
| <i>Intercept</i>                                      |           | <b>11.10</b>                           |                                             | <0.0001        |

<sup>1</sup> As the p-values and CIs presented here have been calculated using different assumptions (it is not possible to calculate 95% CIs that correspond to the more robust Kenward-Roger adjusted p-values), the 95% CIs may cross zero while the p-values are not significant.

<sup>2</sup> Day 0 is the day that the intervention was implemented

Coefficients in bold are significant at p<0.05.
