# Supplementary material for: Impact of increasing the proportion of healthier foods available on energy purchased in worksite cafeterias: A stepped wedge randomized controlled pilot trial
Source: PubMed Central journal article supplement (PMC6335439; doi:10.1016/j.appet.2018.11.013), 2019-02-01
Supplement: mmc3.pdf [file mmc3.pdf]

**S3 Table.** Regression coefficients for availability intervention variables in analyses with total energy purchased daily as the outcome

| Analysis | Variable                               |        | Coefficients<br>(95% CIs) <sup>1</sup>  | Percentage<br>change<br>(95% CIs) <sup>1</sup> | p <sup>1</sup> |
|----------|----------------------------------------|--------|-----------------------------------------|------------------------------------------------|----------------|
| Overall  | Availability intervention period       |        | <b>-0.075</b><br><b>(-0.119,-0.031)</b> | -7.19<br>(-11.18,-3.03)                        | 0.021          |
| By site  | Availability<br>intervention<br>period | Site 1 | -0.007<br>(-0.082,0.068)                | -0.66<br>(-7.84,7.07)                          | 0.870          |
|          |                                        | Site 2 | -0.081<br>(-0.148,-0.014)               | -7.78<br>(-13.75,-1.37)                        | 0.088          |
|          |                                        | Site 3 | <b>-0.099</b><br><b>(-0.170,-0.029)</b> | -9.46<br>(-15.66,-2.84)                        | 0.046          |
|          |                                        | Site 4 | -0.073<br>(-0.149,0.002)                | -7.06<br>(-13.84,0.23)                         | 0.281          |
|          |                                        | Site 5 | <b>-0.213</b><br><b>(-0.303,-0.123)</b> | -19.17<br>(-26.11,-11.56)                      | 0.013          |
|          |                                        | Site 6 | -0.047<br>(-0.131,0.038)                | -4.55<br>(-12.29,3.87)                         | 0.450          |

<sup>1</sup> As the p-values and CIs presented here have been calculated using different assumptions (it is not possible to calculate 95% CIs that correspond to the more robust Kenward-Roger adjusted p-values), the 95% CIs may cross zero while the p-values are not significant.

Coefficients in bold are significant at  $p < 0.05$ .
